# Supplementary material for: Large variation in participant eligibility criteria used in plantar heel pain research studies - a systematic review
Source: J Foot Ankle Res. 2022 Sep 9;15:69. doi: 10.1186/s13047-022-00573-0 (PMC9461187; doi:10.1186/s13047-022-00573-0)
Supplement: Supplementary file 2 — Additional file 2. [file 13047_2022_573_MOESM2_ESM.pdf]

| <b>BMI</b>        |                                             |                                                           |                                   |
|-------------------|---------------------------------------------|-----------------------------------------------------------|-----------------------------------|
| <b>Criterion</b>  | <b>Weighted mean<br/>(kg/m<sup>2</sup>)</b> | <b>Number of studies<br/>reporting<br/>characteristic</b> | <b>Number of<br/>participants</b> |
| No                | 29.2                                        | 103                                                       | 6119                              |
| Between 18 and 30 | 24.4                                        | 1                                                         | 30                                |
| Between 18 and 32 | 29.1                                        | 1                                                         | 40                                |
| Between 20 and 30 | 29.5                                        | 2                                                         | 174                               |
| Less than 29.2    | 26.2                                        | 1                                                         | 70                                |
| Less than 30      | 26.9                                        | 2                                                         | 168                               |
| Less than 35      | 28.9                                        | 2                                                         | 91                                |
| Less than 40      | 30                                          | 1                                                         | 10                                |

| Pain            |                                |                                                  |                           |
|-----------------|--------------------------------|--------------------------------------------------|---------------------------|
| Criterion       | Weighted mean<br>(0 to 10 VAS) | Number of studies<br>reporting<br>characteristic | Number of<br>participants |
| No              | 6.9                            | 94                                               | 5144                      |
| ≥2              | 6.0                            | 2                                                | 50                        |
| ≥3              | 4.1                            | 3                                                | 237                       |
| Between 3 and 8 | 6.3                            | 1                                                | 30                        |
| ≥4              | 6.0                            | 2                                                | 60                        |
| ≥4.9            | 7.8                            | 1                                                | 36                        |
| ≥5              | 6.1                            | 3                                                | 114                       |
| ≥6              | 8.9                            | 3                                                | 282                       |

| Symptom duration        |                        |                                            |                        |
|-------------------------|------------------------|--------------------------------------------|------------------------|
| Criterion               | Weighted mean (months) | Number of studies reporting characteristic | Number of participants |
| No                      | 16.2                   | 53                                         | 3766                   |
| ≥1 week                 | 17.9                   | 1                                          | 142                    |
| ≥1 month                | 40.3                   | 12                                         | 914                    |
| ≥6 weeks                | 4.1                    | 4                                          | 266                    |
| Between 2 and 12 months | 4.8                    | 1                                          | 45                     |
| ≥2 months               | 5.2                    | 4                                          | 211                    |
| ≥3 months               | 16                     | 12                                         | 452                    |
| ≥4 months               | 8.8                    | 2                                          | 65                     |
| ≥6 months               | 16.2                   | 20                                         | 1443                   |
| <12 months              | 5.5                    | 1                                          | 63                     |
| ≥12 months              | 39.4                   | 3                                          | 179                    |

| Age               |                       |                                            |                        |
|-------------------|-----------------------|--------------------------------------------|------------------------|
| Criterion         | Weighted mean (years) | Number of studies reporting characteristic | Number of participants |
| No                | 49.2                  | 100                                        | 5803                   |
| Between 15 and 60 | 39.7                  | 1                                          | 29                     |
| Between 18 and 60 | 45.7                  | 4                                          | 251                    |
| Between 18 and 65 | 46.6                  | 4                                          | 201                    |
| Between 18 and 70 | 45                    | 2                                          | 72                     |
| Between 18 and 75 | 51.5                  | 2                                          | 74                     |
| Between 18 and 80 | 58                    | 1                                          | 10                     |
| Between 20 and 50 | 42.1                  | 2                                          | 95                     |
| Between 20 and 68 | 49.6                  | 1                                          | 40                     |
| Between 20 and 70 | 36.3                  | 2                                          | 82                     |
| Between 30 and 60 | 44.9                  | 1                                          | 8                      |
| Between 30 and 62 | 54.5                  | 1                                          | 30                     |
| Between 38 and 75 | 54.5                  | 1                                          | 84                     |
| Between 40 and 60 | 48.9                  | 3                                          | 90                     |

|                   |      |    |      |
|-------------------|------|----|------|
| ≥15               | 52.4 | 1  | 72   |
| ≥18               | 49   | 55 | 3764 |
| ≥20               | 54.1 | 2  | 56   |
| ≥21               | 49.8 | 1  | 20   |
| ≥40               | 56.4 | 3  | 204  |
| ≥50               | 64.3 | 1  | 117  |
| ≥65               | 70.1 | 3  | 246  |
| Skeletally mature | 46.7 | 2  | 52   |
